# Supplementary material
Source: ML conference proceedings conference paper supplement (https://proceedings.mlr.press/v32/rai14.html)
Supplement: Supplementary file [file rai14-supp.pdf]

# Supplementary Material: Scalable Bayesian Low-Rank Decomposition of Incomplete Multiway Tensors

In our MGP based CP decomposition, the tensor element  $x_{\mathbf{i}}$ , with  $\mathbf{i} = [i_1, i_2, \dots, i_K]$  its  $K$ -dimensional index vector, can be concisely represented as:

$$x_{\mathbf{i}} = \sum_{r=1}^R \lambda_r \prod_{k=1}^K u_{i_{kr}}^{(k)}$$

where

$$\begin{aligned} \lambda_r &\sim \mathcal{N}(0, \tau_r^{-1}), \quad 1 \leq r \leq R \\ \tau_r &= \prod_{l=1}^r \delta_l, \quad \delta_l \sim \text{Ga}(a_c, 1) \quad a_c > 1 \quad 1 < r \leq R \\ \mathbf{u}_r^{(k)} &\sim N(\boldsymbol{\mu}^{(k)}, \Sigma^{(k)}), \quad 1 < r \leq R, \quad 1 < k \leq K \end{aligned}$$

**Theorem 1.** *With  $a_c > 1$ , the sequence  $\sum_{r=1}^R \lambda_r \prod_{k=1}^K u_{i_{kr}}^{(k)}$  converges in  $\ell_2$  as  $R \rightarrow \infty$ .*

**Proof:** To prove Theorem 1, we will make use of the following Lemma.

**Lemma 1.** *A sequence of random variables  $\{X_n\}_{n \geq 1}$  converges to a random variable  $X$  ( $\mathbb{E}(X^2) < \infty$ ) in  $\ell_2$  iff  $\mathbb{E}(X_{n+k} - X_n)^2 \rightarrow 0$  as  $n, k \rightarrow \infty$ .*

Based on the Lemma 1, to prove Theorem 1, we need to show that  $\sum_{r=R+1}^{\infty} \mathbb{E}(\lambda_r \prod_{k=1}^K u_{i_{kr}}^{(k)})^2 = 0$ .

Note that,  $\forall r$ , in our MGP-CP construction  $\lambda_r$  and  $\{u_{i_{kr}}^{(k)}\}_{k=1}^K$  are independent of each other, and  $\mathbb{E}(\lambda_r) = 0$ . Therefore we have

$$\sum_{r=R+1}^{\infty} \mathbb{E}(\lambda_r \prod_{k=1}^K u_{i_{kr}}^{(k)})^2 = \sum_{r=R+1}^{\infty} \mathbb{E}(\lambda_r)^2 \prod_{k=1}^K \mathbb{E}(u_{i_{kr}}^{(k)})^2 \quad (1)$$

where  $\mathbb{E}(\lambda_r)^2 = \mathbb{E}(\mathbb{E}(\lambda_r)^2 | \tau_r) = \mathbb{E}(\frac{1}{\prod_{l=1}^r \delta_l}) = \frac{1}{a_c^r}$ .

Under the assumption that the vectors  $u_{i_{kr}}^{(k)}$  have bounded variances,  $\mathbb{E}(u_{i_{kr}}^{(k)})^2$  will be bounded by  $\zeta_k < \infty$ . Substituting these in Equation 1, we have

$$\sum_{r=R+1}^{\infty} \mathbb{E}(\lambda_r \prod_{k=1}^K u_{i_{kr}}^{(k)})^2 < \prod_{k=1}^K \zeta_k \sum_{r=R+1}^{\infty} \frac{1}{a_c^r} = \prod_{k=1}^K \zeta_k \frac{1}{a_c^R (a_c - 1)}$$

Taking the limit  $R \rightarrow \infty$

$$\lim_{R \rightarrow \infty} \sum_{r=R+1}^{\infty} \mathbb{E}(\lambda_r \prod_{k=1}^K u_{i_{kr}}^{(k)})^2 = \lim_{R \rightarrow \infty} \frac{1}{a_c^R (a_c - 1)} \prod_{k=1}^K \zeta_k = 0$$

Thus the sequence  $\sum_{r=1}^R \lambda_r \prod_{k=1}^K u_{i_{kr}}^{(k)}$  converges in  $\ell_2$  as  $R \rightarrow \infty$ , which completes the proof of Theorem 1.

Although the MGP construction is originally unbounded [1], a consequence of Theorem 1 is that even when a finite truncation level  $R$  is used, the approximation error due truncation  $R$  decreases exponentially fast with increasing  $R$ , as given by the following:

**Theorem 2.** Denote the residual by  $M_{i_1 i_2 \dots i_k}^R = \sum_{r=R+1}^{\infty} \lambda_r \prod_{k=1}^K u_{i_k r}^{(k)}$ . Then  $\forall \epsilon > 0$  we have  $P\{(M_{i_1 i_2 \dots i_k}^R)^2 > \epsilon\} < \frac{1}{\epsilon a_c^R (a_c - 1)} \prod_{k=1}^K \zeta_k$

**Proof:** We have  $P\{(M_{i_1 i_2 \dots i_k}^R)^2 \leq \epsilon\} = \mathbb{E}(P\{(M_{i_1 i_2 \dots i_k}^R)^2 \leq \epsilon | \tau\}) = 1 - \mathbb{E}(P\{(M_{i_1 i_2 \dots i_k}^R)^2 > \epsilon | \tau\}) = 1 - \frac{\mathbb{E}(\mathbb{E}((M_{i_1 i_2 \dots i_k}^R)^2 | \tau))}{\epsilon}$  where  $\mathbb{E}(\mathbb{E}((M_{i_1 i_2 \dots i_k}^R)^2 | \tau)) < \frac{1}{a_c^R (a_c - 1)} \prod_{k=1}^K \zeta_k$  as shown in the proof of Theorem 1. Thus we have  $P\{(M_{i_1 i_2 \dots i_k}^R)^2 > \epsilon\} < \frac{1}{\epsilon a_c^R (a_c - 1)} \prod_{k=1}^K \zeta_k$ .

## References

- [1] A. Bhattacharya and D. Dunson. Sparse bayesian infinite factor models. *Biometrika*, 2011.
